# Supplementary material for: Chinese Word Segmentation via BiLSTM+Semi-CRF with Relay Node
Source: Springer Nature journal article supplement (doi:10.1007/s11390-020-9576-4), 2020-09-30
Supplement: 11390_2020_9576_MOESM1_ESM.pdf [file 11390_2020_9576_MOESM1_ESM.pdf]

- Chinese Word Segmentation via BiLSTM+Semi-CRF with Relay Node
- Nuo Qun, Hang Yan, Xipeng Qiu, Member, CCF and Xuanjing Huang, Member, CCF
- Highlights:
  - A simple but effective BiLSTM+Semi-CRF model to extract the utilize the contextual segment information.
  - A new decoding algorithm to allow the Semi-CRF handle arbitrarily long segment with linear computation costs.
  - The combination with publicly available word embeddings makes the proposed model outperform previous word-based models.

Qun N, Yan H, Qiu XP et al. Chinese word segmentation via BiLSTM+Semi-CRF with relay node. JOURNAL OF COMPUTER SCIENCE AND TECHNOLOGY 35(5): 1115–1126 Sept. 2020. DOI 10.1007/s11390-020-9576-4

# Proposed BiLSTM+Semi-CRF Architecture

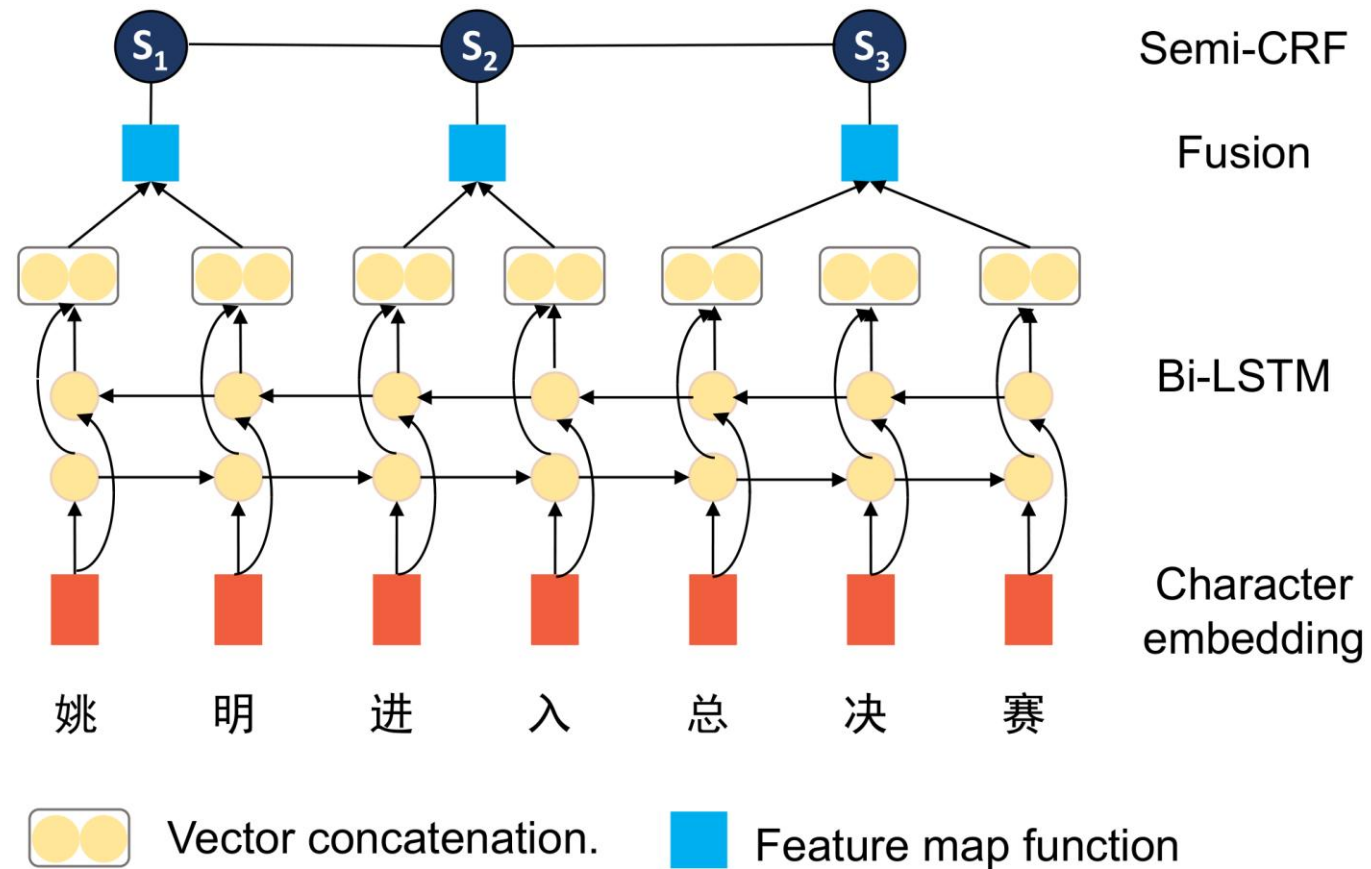

# Decoding process for the Semi-CRF and Semi-CRF-Relay

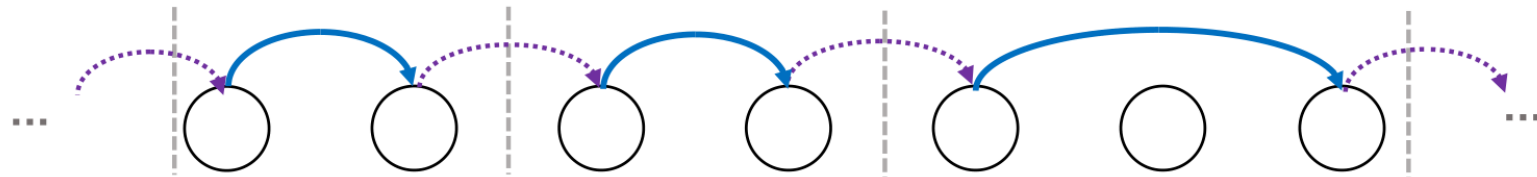

(a) Path for semi-CRF

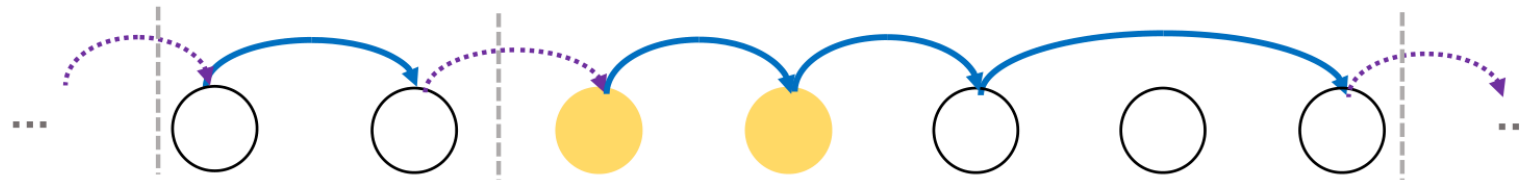

(b) Path for semi-CRF-Relay

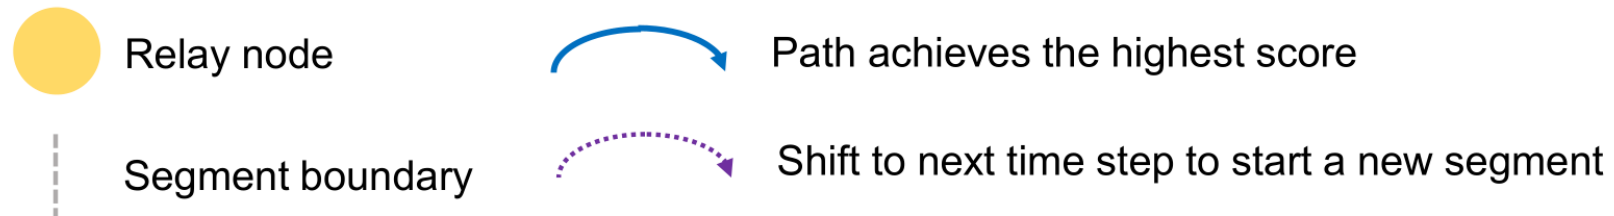

# Main Results

**Table 5.** Main Results (F1 Scores). The number in the brackets is the standard deviation of five repeated experiments. We set the maximum length limit  $L = 4$  for all of the Semi-CRF-Relay experiments, and  $L = 6$  for all of the Semi-CRF experiments.

| Models                                | PKU                | MSRA               | AS                 | CITYU              | Avg.         |
|---------------------------------------|--------------------|--------------------|--------------------|--------------------|--------------|
| Character-Based Models:               |                    |                    |                    |                    |              |
| MMTNN [4]                             | 95.2               | 97.2               | -                  | -                  | -            |
| GRNN [22]                             | 94.5*              | 95.4*              | -                  | -                  | -            |
| LSTM [5]                              | 94.8*              | 95.6*              | -                  | -                  | -            |
| BiLSTM+CRF (our implementation)       | 94.88(0.13)        | 96.92(0.07)        | 95.36(0.10)        | 95.35(0.04)        | 95.63        |
| Word-Based Models:                    |                    |                    |                    |                    |              |
| Neural Semi-CRF <sup>§</sup> [11]     | 93.91              | 95.21              | -                  | -                  | -            |
| NSSM [9]                              | 95.5               | 96.5               | -                  | -                  | -            |
| SRNN [20]                             | 91.3               | 90.7               | 93.7               | 93.5               | 92.3         |
| BiLSTM+Semi-CRF <sup>§</sup>          | 95.03(0.07)        | 96.29(0.13)        | 95.52(0.02)        | 95.65(0.05)        | 95.62        |
| BiLSTM+Semi-CRF-Relay <sup>§</sup>    | 94.99(0.11)        | 97.01(0.06)        | 95.58(0.04)        | 95.65(0.07)        | 95.81        |
| BiLSTM+Semi-CRF+SE <sup>‡</sup>       | 95.69(0.01)        | 96.99(0.01)        | <b>95.90(0.04)</b> | 96.22(0.04)        | 96.20        |
| BiLSTM+Semi-CRF-Relay+SE <sup>‡</sup> | <b>95.75(0.06)</b> | <b>97.54(0.01)</b> | 95.87(0.03)        | <b>96.27(0.05)</b> | <b>96.36</b> |

<sup>§</sup> indicates models without the segment embedding  $\mathbf{e}_{s_k}$ .

\* For a fair comparison, we use the results reported in [9], in which the preprocessing phase in the original work is not adopted.

<sup>‡</sup> SE means “segment embeddings”.
